# Supplementary material
Source: Frontiers journal article supplement (https://www.frontiersin.org/articles/492427)

**Supplementary Table-1:** The WHO and IUATLD grading scale for AFB positivity of clinical specimens used in this study

| <i>Reporting scale</i> | <i>Sample size (n) and % positivity<sup>a</sup></i> | <i>AFB seen (1 length of 40 fields)</i> |                                             |
|------------------------|-----------------------------------------------------|-----------------------------------------|---------------------------------------------|
|                        |                                                     | <i>200x</i>                             | <i>400x</i>                                 |
| 1+                     | 36 (65.5)                                           | 30-299 AFB per 1 length                 | 1-19 AFB per 1 length                       |
| 2+                     | 15 (27.2)                                           | 10-100 AFB per 1 field on average       | 20-199 AFB per 1 length                     |
| 3+                     | 4 (7.3)                                             | >100 AFB per field on average           | 5-50 AFB per 1 field (20 fields on average) |

<sup>a</sup> these samples were used to determine the effect of RPF on time to detect Mtb (n=55)

**Supplementary Figure-1:** Classification of sputum samples and the number of samples used in various assays

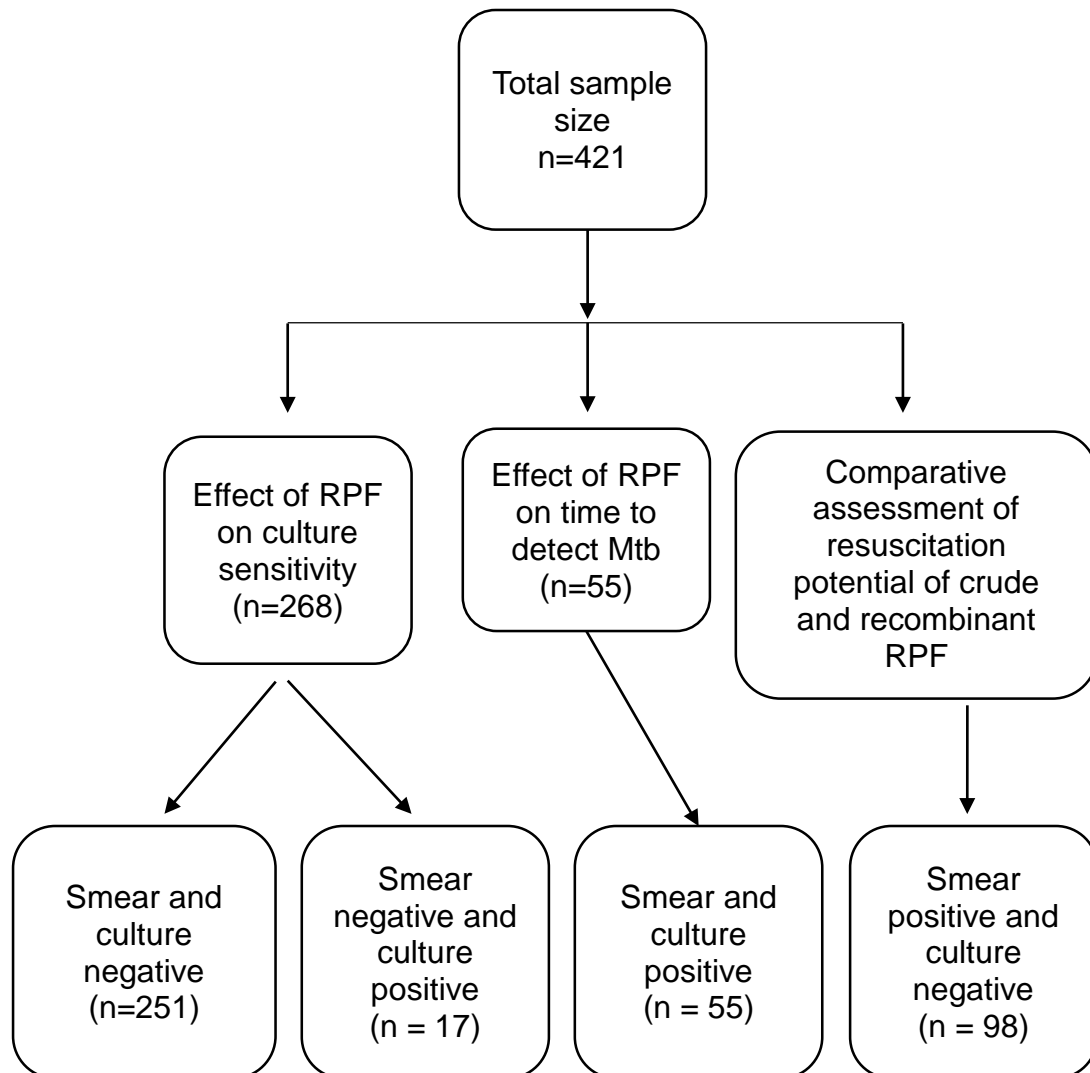

**A**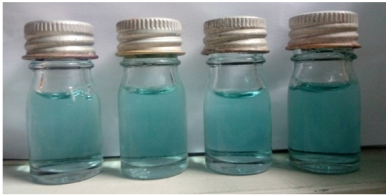**B**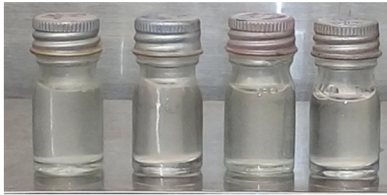

A

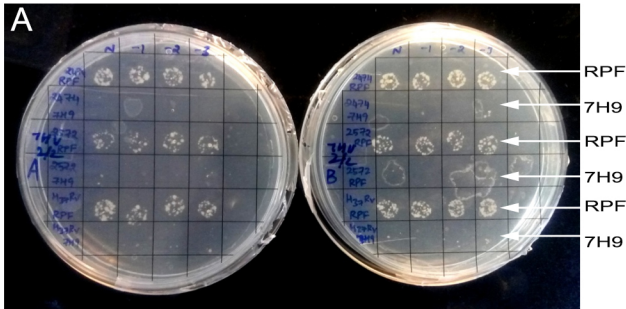

B

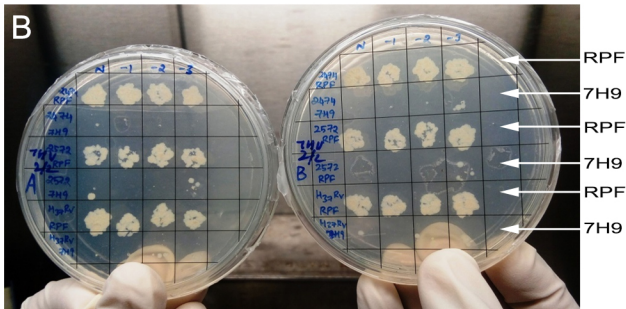

Supplement: Data_Sheet_1.PDF [file Data_Sheet_1.PDF]
